# Supplementary material for: Identification of a High-Risk Group of New-Onset Cardiovascular Disease in Occupational Drivers by Analyzing Heart Rate Variability
Source: MDPI journal article supplement (doi:10.3390/ijerph182111486), 2021-10-31
Supplement: s1 [file s1]

**Table S1. Definition of HRV measures.**

| Parameter                        | Unit            | Description                                              |
|----------------------------------|-----------------|----------------------------------------------------------|
| <b>Time-domain measures</b>      |                 |                                                          |
| SDNN                             | ms              | Standard deviation of normal RR intervals                |
| RMSSD                            | ms              | Root mean square of successive RR interval differences   |
| <b>Frequency-domain measures</b> |                 |                                                          |
| LF power                         | ms <sup>2</sup> | Absolute power of the low-frequency band (0.04–0.15 Hz)  |
| HF power                         | ms <sup>2</sup> | Absolute power of the high-frequency band (0.15–0.40 Hz) |
| LF/HF                            | %               | Ratio of LF-to-HF power                                  |

RR intervals = interbeat intervals between all successive heartbeats.

**Table S2. Compared HRV index for cardiovascular diagnostic categories in study population (n=788) <sup>a, b.</sup>**

|                                                                                                                           |     | SDNN(ms) |             |           |                | RMSSD(ms)   |           |                | LF(ms <sup>2</sup> ) |           |                | HF (ms <sup>2</sup> ) |           |                | LF/HF       |           |                |
|---------------------------------------------------------------------------------------------------------------------------|-----|----------|-------------|-----------|----------------|-------------|-----------|----------------|----------------------|-----------|----------------|-----------------------|-----------|----------------|-------------|-----------|----------------|
|                                                                                                                           |     | <i>n</i> | <i>mean</i> | <i>sd</i> | <i>p-value</i> | <i>mean</i> | <i>sd</i> | <i>p-value</i> | <i>mean</i>          | <i>sd</i> | <i>p-value</i> | <i>mean</i>           | <i>sd</i> | <i>p-value</i> | <i>mean</i> | <i>sd</i> | <i>p-value</i> |
| <b>Cardiovascular disease<br/>(ICD-9-CM: 390-459)</b>                                                                     | No  | 627      | 30.5        | 15.3      | 0.015          | 19.1        | 13.8      | 0.137          | 341.8                | 499.8     | 0.005          | 149.1                 | 349.9     | 0.053          | 3.57        | 3.55      | 0.249          |
|                                                                                                                           | Yes | 161      | 29.1        | 24.7      |                | 19.2        | 18.8      |                | 268.5                | 464.7     |                | 124.8                 | 193.5     |                | 3.34        | 3.98      |                |
| Cardiovascular disease<br>(not included Hypertensive<br>disease) (ICD9: 391,<br>392.0, 393-398, 410-414,<br>416, 420-429) | No  | 739      | 29.9        | 15.0      | 0.433          | 18.8        | 13.3      | 0.922          | 324.7                | 472.1     | 0.203          | 144.0                 | 326.4     | 0.081          | 3.48        | 3.47      | 0.650          |
|                                                                                                                           | Yes | 49       | 34.2        | 40.5      |                | 24.4        | 30.5      |                | 357.7                | 751.2     |                | 145.9                 | 291.1     |                | 4.15        | 5.54      |                |
| Hypertensive disease<br>(ICD9: 401-405)                                                                                   | No  | 660      | 30.8        | 17.1      | <0.001         | 19.4        | 14.9      | 0.021          | 342.3                | 498.9     | 0.005          | 148.8                 | 343.6     | 0.029          | 3.53        | 3.50      | 0.398          |
|                                                                                                                           | Yes | 128      | 27.1        | 19.9      |                | 17.5        | 14.9      |                | 246.9                | 458.2     |                | 120.3                 | 194.9     |                | 3.46        | 4.31      |                |
| Ischemic heart disease<br>(ICD9: 410-414)                                                                                 | No  | 753      | 30.1        | 16.5      | 0.776          | 18.9        | 14.1      | 0.971          | 324.6                | 474.6     | 0.645          | 143.4                 | 325.0     | 0.622          | 3.50        | 3.56      | 0.970          |
|                                                                                                                           | Yes | 35       | 32.8        | 34.0      |                | 23.4        | 27.4      |                | 374.2                | 807.9     |                | 159.1                 | 310.5     |                | 3.93        | 5.02      |                |
| Congestive heart failure<br>(CHF) (ICD9: 398.91,<br>422, 425, 428, 402.x1,<br>404.x1, 404.x3)                             | No  | 773      | 30.0        | 16.3      | 0.947          | 18.9        | 14.2      | 0.515          | 326.5                | 492.0     | 0.501          | 143.9                 | 325.5     | 0.332          | 3.49        | 3.54      | 0.714          |
|                                                                                                                           | Yes | 15       | 40.3        | 52.1      |                | 29.8        | 35.8      |                | 339.7                | 583.8     |                | 157.0                 | 254.0     |                | 4.90        | 7.02      |                |

a. The selection criterial for CVD events was the least five clinical visit records within a year or at least one inpatient record

b. Assess the difference in mean natural log (Ln)-transformed markers

**Table S3. Hazard ratios and 95% confidence intervals for cardiovascular diagnostic categories by HRV index in the study population (n = 788).**

|                                    |                                                     | Cardiovascular disease (not included<br>Hypertensive disease) |       |         |              | Hypertensive disease |         |              | Ischemic heart disease |         |              | Congestive heart failure<br>(CHF) |         |      |      |      |      |
|------------------------------------|-----------------------------------------------------|---------------------------------------------------------------|-------|---------|--------------|----------------------|---------|--------------|------------------------|---------|--------------|-----------------------------------|---------|------|------|------|------|
| Independent variables <sup>c</sup> |                                                     | Hazard Ratio                                                  | 95%CI | p-value | Hazard Ratio | 95%CI                | p-value | Hazard Ratio | 95%CI                  | p-value | Hazard Ratio | 95%CI                             | p-value |      |      |      |      |
| Model 1 <sup>a</sup>               |                                                     |                                                               |       |         |              |                      |         |              |                        |         |              |                                   |         |      |      |      |      |
| 1                                  | As a continuous (LnSDNN)                            | 0.73                                                          | 0.40  | 1.35    | 0.32         | 0.57                 | 0.39    | 0.83         | 0.001                  | 0.99    | 0.48         | 2.06                              | 0.98    | 1.14 | 0.38 | 3.41 | 0.82 |
| 2                                  | As a categorical variable:<br>SDNN (≤30 vs. >30)    | 2.00                                                          | 1.04  | 3.85    | 0.04         | 1.51                 | 1.02    | 2.23         | 0.04                   | 1.42    | 0.68         | 2.98                              | 0.35    | 1.64 | 0.50 | 5.41 | 0.42 |
| 3                                  | As a continuous<br>(LnRMSSD)                        | 0.96                                                          | 0.58  | 1.57    | 0.86         | 0.74                 | 0.54    | 1.02         | 0.06                   | 1.07    | 0.59         | 1.94                              | 0.82    | 1.94 | 0.82 | 4.57 | 0.13 |
| 4                                  | As a categorical variable:<br>RMSSD (≤20 vs. >20)   | 1.54                                                          | 0.81  | 2.94    | 0.19         | 1.48                 | 0.99    | 2.21         | 0.06                   | 1.17    | 0.57         | 2.41                              | 0.68    | 0.93 | 0.31 | 2.78 | 0.89 |
| 5                                  | As a continuous (LnLF)                              | 0.87                                                          | 0.68  | 1.11    | 0.26         | 0.83                 | 0.71    | 0.97         | 0.02                   | 0.99    | 0.74         | 1.34                              | 0.97    | 0.97 | 0.60 | 1.55 | 0.88 |
| 6                                  | As a categorical variable: LF<br>(≤380 vs. >380)    | 1.36                                                          | 0.65  | 2.86    | 0.41         | 1.28                 | 0.82    | 2.01         | 0.28                   | 1.11    | 0.48         | 2.58                              | 0.81    | 0.95 | 0.25 | 3.55 | 0.94 |
| 7                                  | As a continuous (LnHF)                              | 0.83                                                          | 0.65  | 1.05    | 0.12         | 0.90                 | 0.77    | 1.04         | 0.15                   | 0.98    | 0.73         | 1.31                              | 0.87    | 0.89 | 0.56 | 1.43 | 0.63 |
| 8                                  | As a categorical variable:<br>HF (≤168 vs. >168)    | 1.06                                                          | 0.53  | 2.12    | 0.87         | 1.18                 | 0.76    | 1.85         | 0.46                   | 0.86    | 0.40         | 1.86                              | 0.70    | 0.53 | 0.15 | 1.80 | 0.31 |
| 9                                  | As a continuous (LnLF/HF)                           | 1.08                                                          | 0.80  | 1.46    | 0.60         | 0.89                 | 0.74    | 1.08         | 0.24                   | 1.03    | 0.73         | 1.45                              | 0.88    | 1.12 | 0.64 | 1.94 | 0.70 |
| 10                                 | As a categorical variable:<br>LF/HF (≤3.5 vs. >3.5) | 0.76                                                          | 0.43  | 1.34    | 0.34         | 1.25                 | 0.85    | 1.83         | 0.25                   | 0.77    | 0.39         | 1.52                              | 0.45    | 0.98 | 0.33 | 2.91 | 0.97 |
| Model 2 <sup>a</sup>               |                                                     |                                                               |       |         |              |                      |         |              |                        |         |              |                                   |         |      |      |      |      |
| 11                                 | As a continuous (LnSDNN)                            | 0.85                                                          | 0.47  | 1.51    | 0.58         | 0.59                 | 0.40    | 0.87         | 0.01                   | 1.08    | 0.56         | 2.10                              | 0.81    | 1.12 | 0.36 | 3.49 | 0.85 |
| 12                                 | As a categorical variable:<br>SDNN (≤30 vs. >30)    | 1.81                                                          | 0.93  | 3.53    | 0.08         | 1.53                 | 1.02    | 2.29         | 0.04                   | 1.27    | 0.60         | 2.70                              | 0.53    | 2.13 | 0.59 | 7.75 | 0.25 |
| 13                                 | As a continuous<br>(LnRMSSD)                        | 1.00                                                          | 0.64  | 1.58    | 1.00         | 0.73                 | 0.53    | 1.01         | 0.06                   | 1.13    | 0.66         | 1.92                              | 0.66    | 1.65 | 0.67 | 4.05 | 0.28 |
| 14                                 | As a categorical variable:<br>RMSSD (≤20 vs. >20)   | 1.44                                                          | 0.75  | 2.76    | 0.28         | 1.54                 | 1.02    | 2.33         | 0.04                   | 1.07    | 0.51         | 2.22                              | 0.87    | 1.01 | 0.30 | 3.38 | 0.99 |
| 15                                 | As a continuous (LnLF)                              | 0.93                                                          | 0.73  | 1.19    | 0.54         | 0.86                 | 0.73    | 1.01         | 0.07                   | 1.07    | 0.81         | 1.42                              | 0.64    | 0.95 | 0.57 | 1.56 | 0.82 |
| 16                                 | As a categorical variable: LF<br>(≤380 vs. >380)    | 1.23                                                          | 0.58  | 2.57    | 0.59         | 1.25                 | 0.79    | 1.99         | 0.34                   | 1.02    | 0.44         | 2.37                              | 0.96    | 1.13 | 0.26 | 4.94 | 0.87 |
| 17                                 | As a continuous (LnHF)                              | 0.88                                                          | 0.70  | 1.11    | 0.29         | 0.89                 | 0.76    | 1.04         | 0.13                   | 1.01    | 0.77         | 1.32                              | 0.93    | 0.83 | 0.51 | 1.35 | 0.46 |

|    |                                                               |      |      |      |      |      |      |      |      |      |      |      |      |      |      |      |      |
|----|---------------------------------------------------------------|------|------|------|------|------|------|------|------|------|------|------|------|------|------|------|------|
| 18 | As a categorical variable:<br>HF ( $\leq 168$ vs. $>168$ )    | 1.01 | 0.50 | 2.03 | 0.97 | 1.29 | 0.82 | 2.05 | 0.27 | 0.83 | 0.38 | 1.82 | 0.65 | 0.61 | 0.16 | 2.41 | 0.48 |
| 19 | As a continuous (LnLF/HF)                                     | 1.11 | 0.82 | 1.52 | 0.50 | 0.97 | 0.80 | 1.18 | 0.77 | 1.09 | 0.77 | 1.54 | 0.65 | 1.21 | 0.67 | 2.19 | 0.53 |
| 20 | As a categorical variable:<br>LF/HF ( $\leq 3.5$ vs. $>3.5$ ) | 0.67 | 0.37 | 1.21 | 0.18 | 1.05 | 0.71 | 1.54 | 0.82 | 0.70 | 0.35 | 1.40 | 0.31 | 0.73 | 0.24 | 2.27 | 0.59 |

<sup>a</sup>. Model 1: Adjusted for age at first employment ( $\geq 45$  vs.  $< 45$  years), body mass index ( $> 30$  vs.  $\leq 30$ ), education, drinking, smoking, exercise, time since first employment (years), and shift work.

<sup>b</sup>. Model 2: As Model 1 and with additional adjustments for systolic blood pressure, LnCHOL, LnTG, LnHDL, and LnAC.

<sup>c</sup>. Each independent variable (1–20) was separately included in the models.

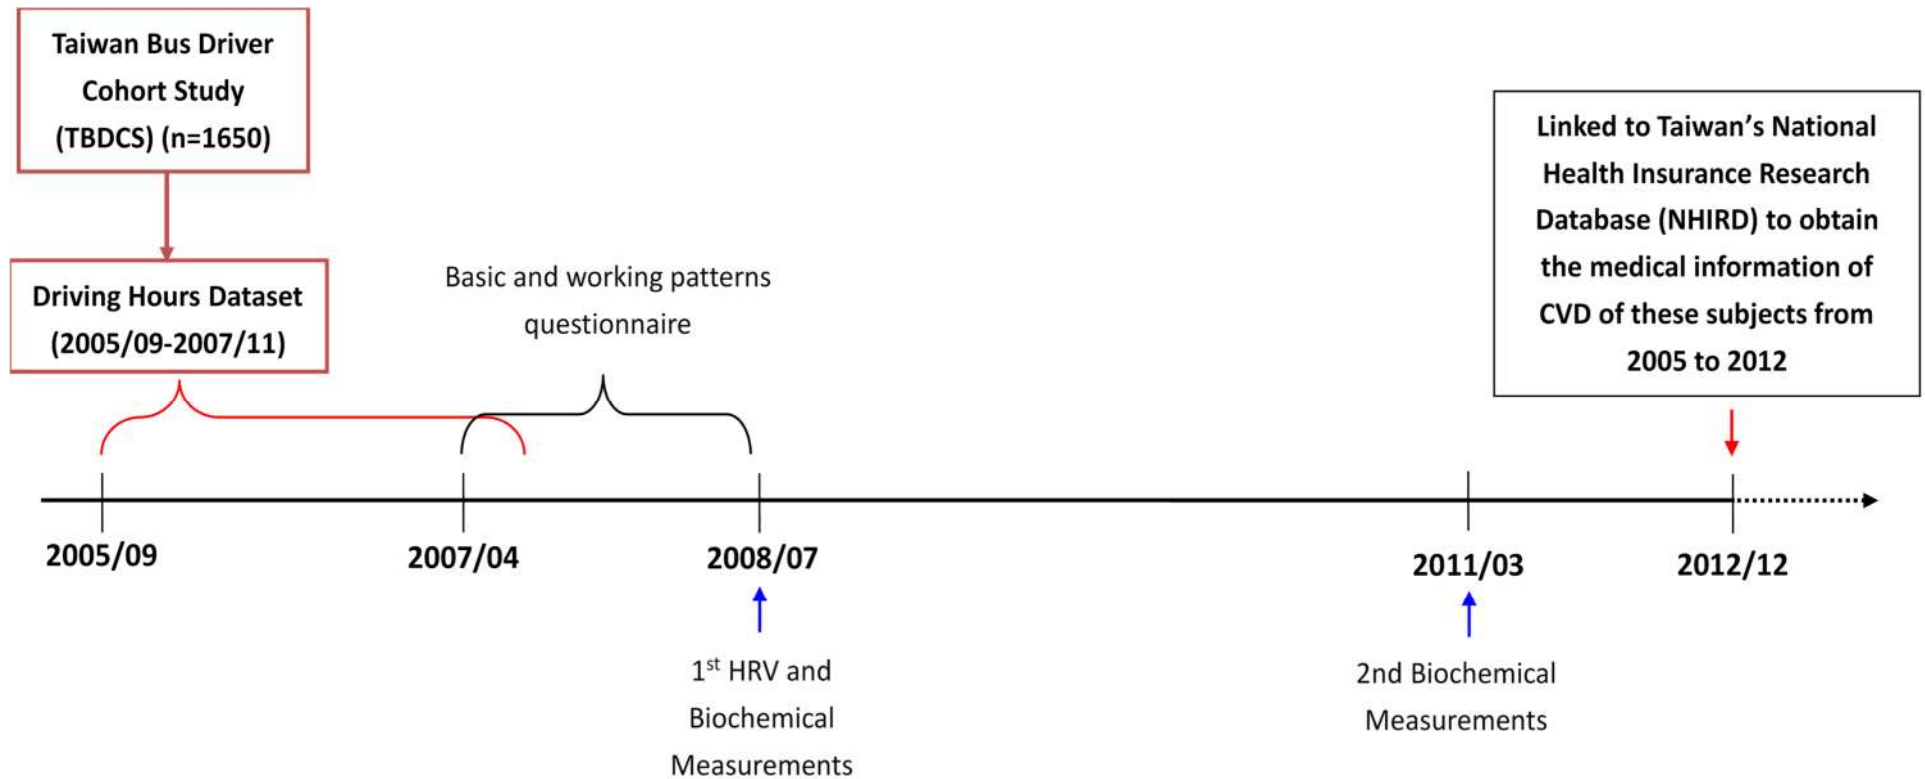

**Supplement Figure S1. Taiwan Bus Driver Cohort Study (TBDCS) schedule diagram**
